# Supplementary material
Source: PubMed Central journal article supplement (PMC4011186)
Supplement: NIHMS573997-supplement-01.pdf [file NIHMS573997-supplement-01.pdf]

SUPPLEMENTARY DATA FOR:

Studies on the Antiproliferative Effects of Tropolone Derivatives in Jurkat T-Lymphocyte Cells

Sophia N. Ononye, Michael D. Van Heyst, Charles Giardina, Dennis L. Wright and Amy C. Anderson

Department of Pharmaceutical Sciences, University of Connecticut, 69 N. Eagleville Rd., Storrs, CT 06269

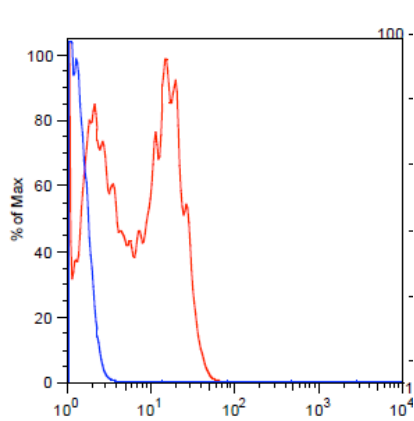

a) Experimental/compensation controls [2° antibody (blue); untreated control (red)]

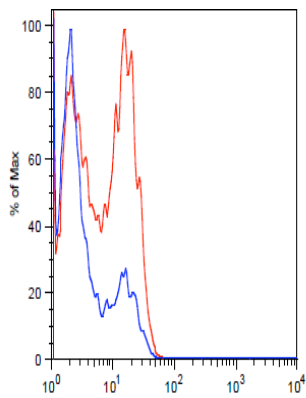

b) Compound 4

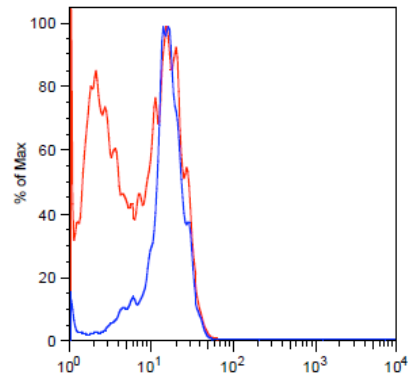

c) Compound 1

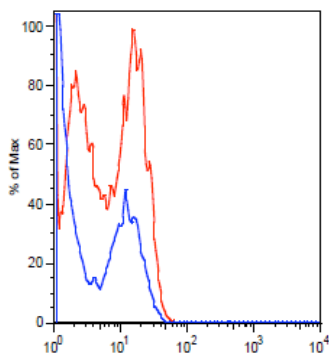

d) Compound 2

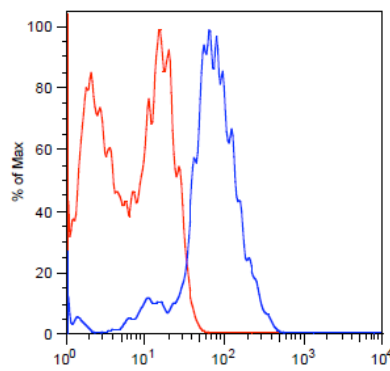

e) Vorinostat

**Figure S1a.** Modulation of histone H3K9Ac antibodies in Jurkat cells after a 12h treatment with 10  $\mu$ M HDACi. **Note:** Untreated control for pertinent HDACi treatments represented in red and HDACi represented in blue on the corresponding histograms.

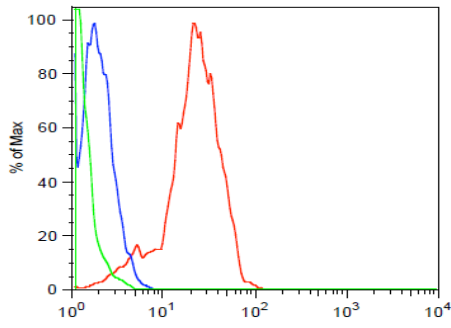

Experimental/compensation controls [unlabeled cells (green); 2° antibody (blue); untreated control (red)].

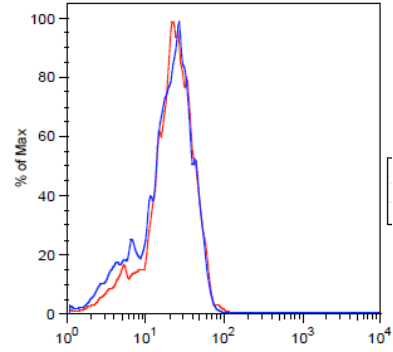

Compound 4

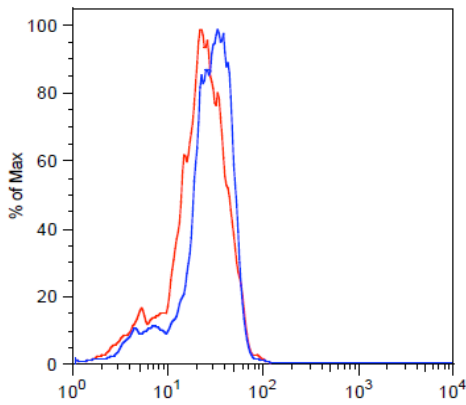

Compound 1

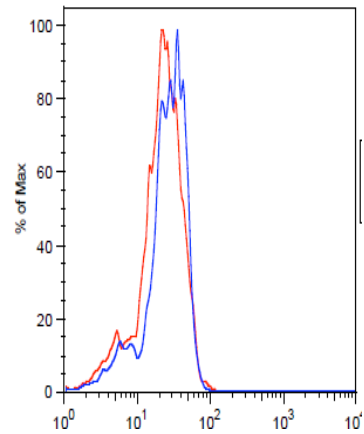

Compound 2

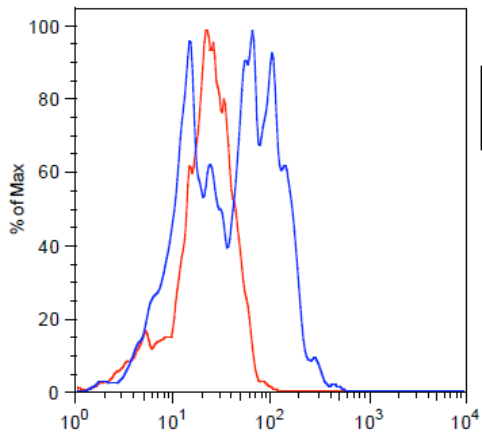

Vorinostat

**Figure S1b.** Modulation of histone H3K23Ac antibodies in Jurkat cells after a 12h treatment with 10  $\mu$ M HDACi. **Note:** Untreated control for pertinent HDACi treatments represented in red and HDACi represented in blue on the corresponding histograms.

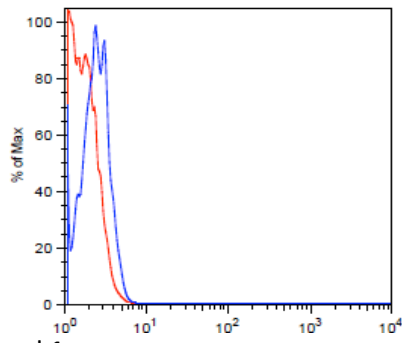

Compound 1

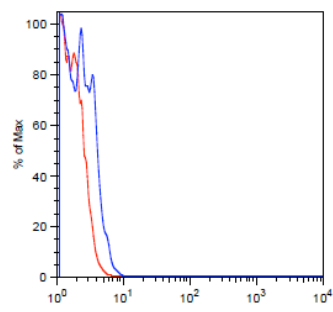

Compound 2

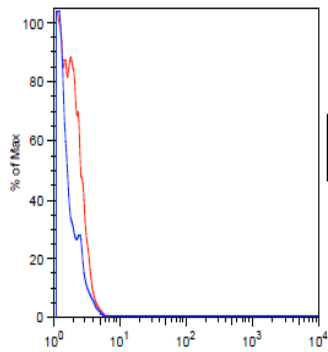

Compound 4

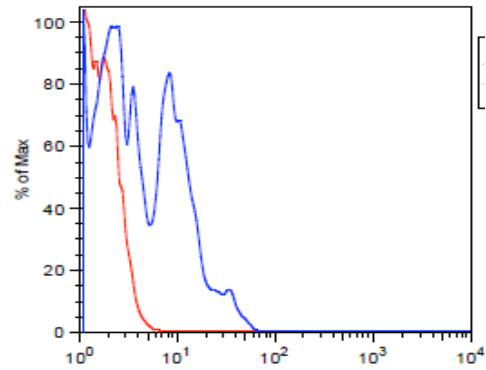

Vorinostat

**Figure S2.** Evaluation of p21 expression in Jurkat cells after a **24h** treatment with **10  $\mu$ M** HDACi. **Note:** Untreated control for pertinent HDACi treatments represented in red and HDACi represented in blue on the corresponding histograms.

**Table S1.** Time-dependent antiproliferative effects of tropolones and vorinostat on cell cycle progression

| Time-dependent analysis of the antiproliferative effects of tropolones on cell cycle progression as measured via FACS analysis in Jurkat cells after a 24h treatment. |         |       |       |       |
|-----------------------------------------------------------------------------------------------------------------------------------------------------------------------|---------|-------|-------|-------|
| Treatment                                                                                                                                                             | 24h     |       |       |       |
|                                                                                                                                                                       | %<G0/G1 | %G1   | %S    | %G2-M |
| Control                                                                                                                                                               | 2.39    | 60.90 | 20.90 | 14.30 |
| 10 $\mu$ M Vorinostat                                                                                                                                                 | 48.90   | 7.46  | 19.90 | 12.30 |
| 10 $\mu$ M Compound 1                                                                                                                                                 | 13.90   | 70.20 | 13.30 | 1.81  |
| 10 $\mu$ M Compound 2                                                                                                                                                 | 13.90   | 66.50 | 15.80 | 2.58  |
| 10 $\mu$ M Compound 4                                                                                                                                                 | 1.62    | 63.00 | 20.60 | 13.50 |

| Time-dependent analysis of the antiproliferative effects of tropolones on cell cycle progression as measured via FACS analysis in Jurkat cells after a 36h treatment. |         |       |       |       |
|-----------------------------------------------------------------------------------------------------------------------------------------------------------------------|---------|-------|-------|-------|
| Treatment                                                                                                                                                             | 36h     |       |       |       |
|                                                                                                                                                                       | %<G0/G1 | %G1   | %S    | %G2-M |
| Control                                                                                                                                                               | 1.80    | 59.10 | 23.00 | 14.20 |
| 10 $\mu$ M Vorinostat                                                                                                                                                 | 60.80   | 6.90  | 15.60 | 14.90 |
| 10 $\mu$ M Compound 1                                                                                                                                                 | 18.50   | 64.20 | 13.30 | 2.97  |
| 10 $\mu$ M Compound 2                                                                                                                                                 | 13.40   | 65.90 | 14.60 | 4.35  |
| 10 $\mu$ M Compound 4                                                                                                                                                 | 1.22    | 60.70 | 21.80 | 14.60 |

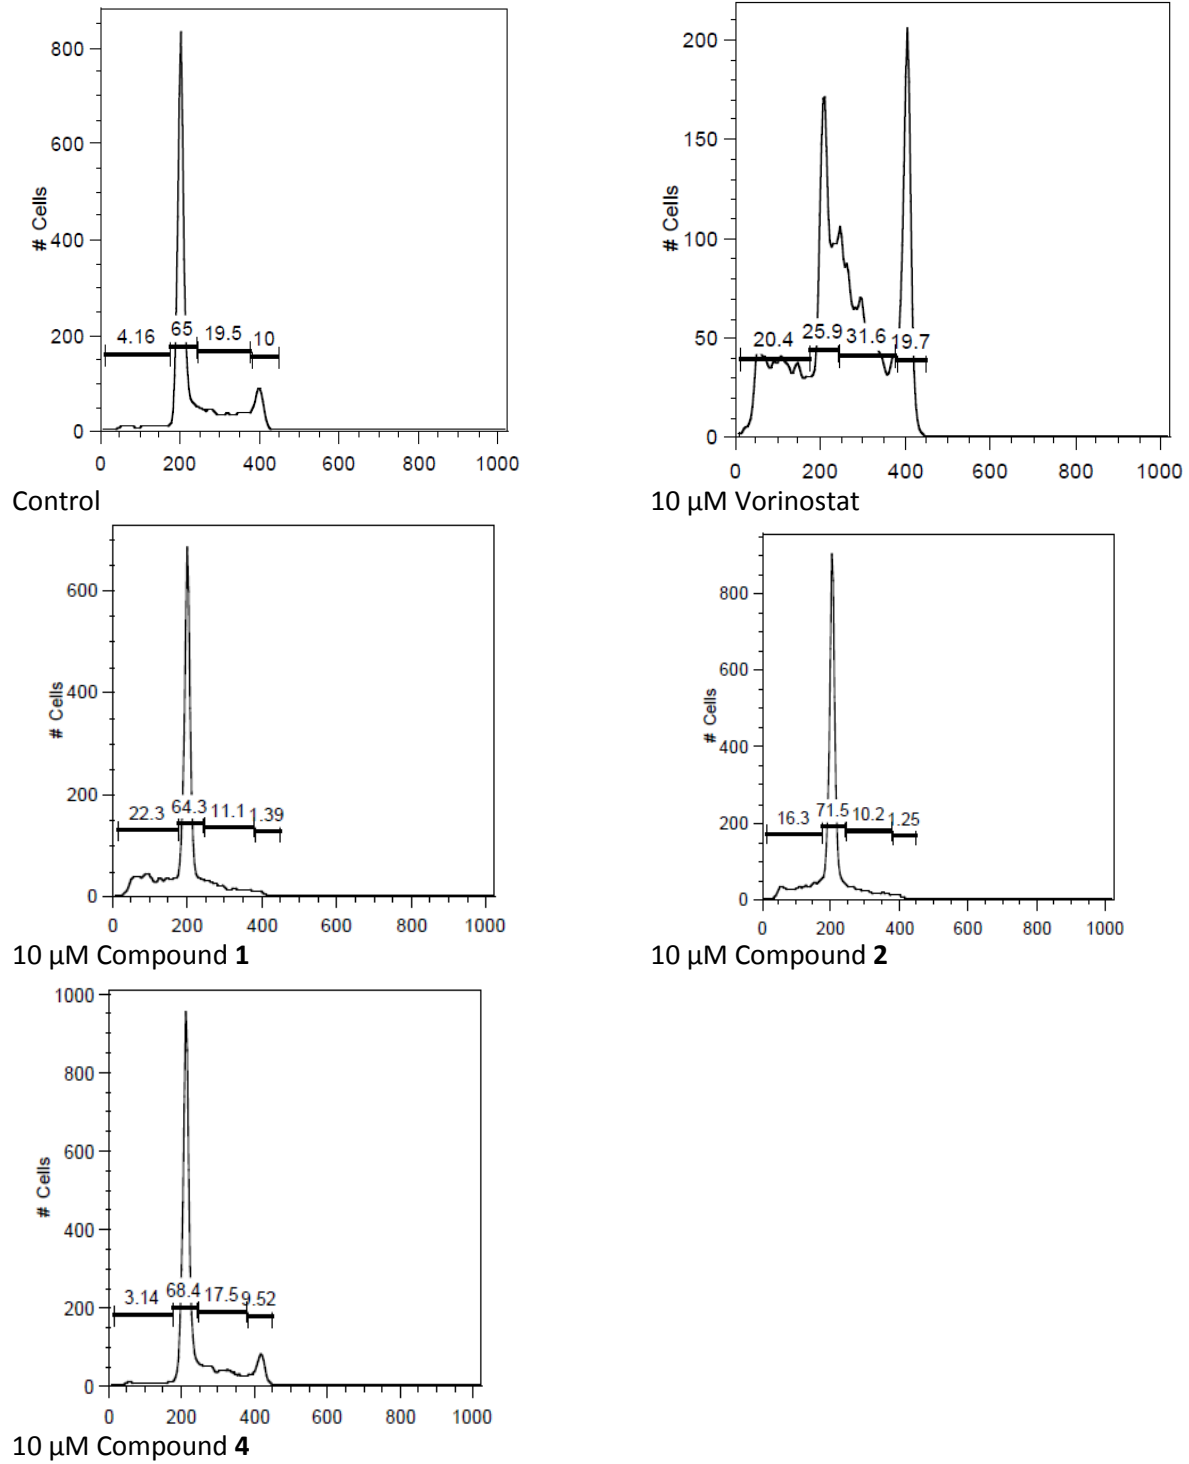

**Figure S3.** Histograms for cell cycle analysis

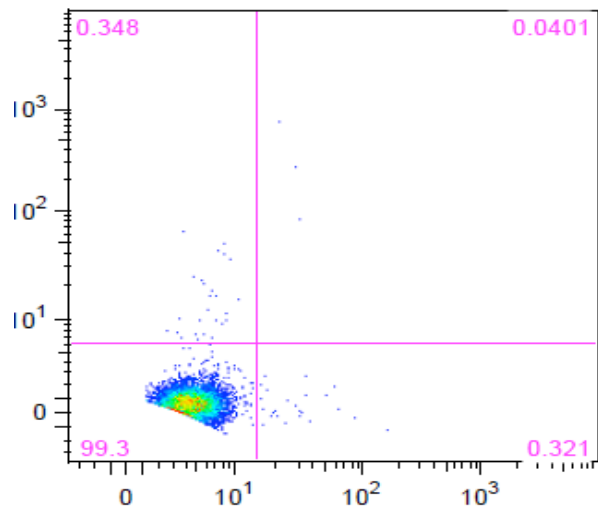

a) Control

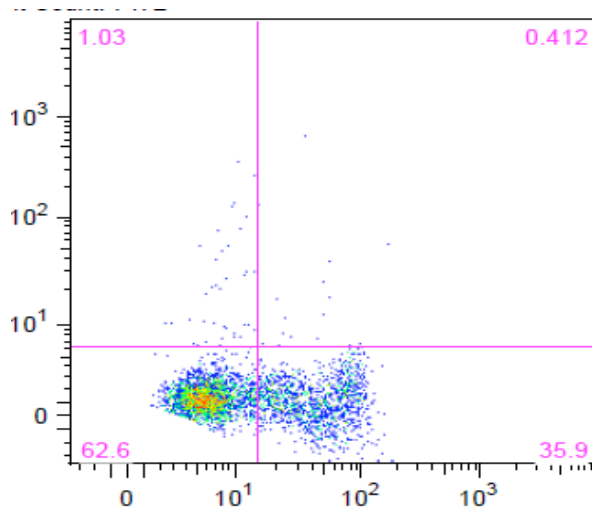

b) Vorinostat

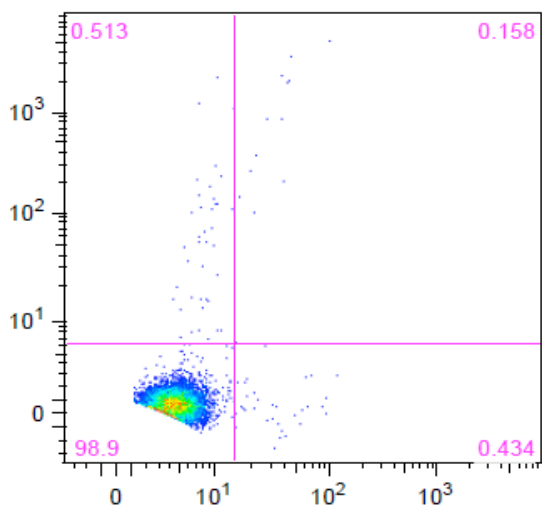

c) Compound 1

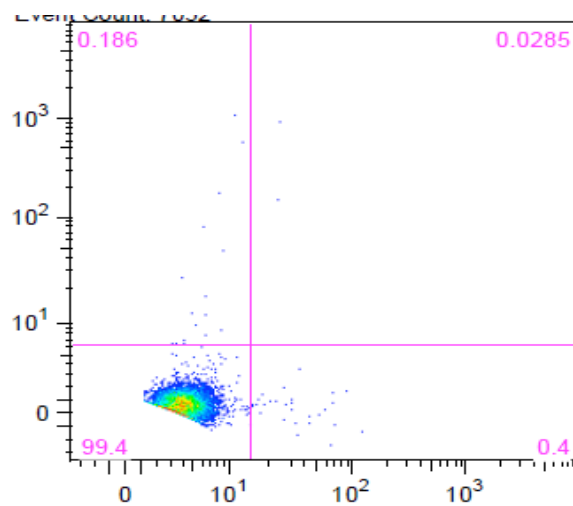

d) Compound 2

**Figure S4:** Evaluation of Caspase 8 activation in Jurkat cells after a 24h treatment with 10  $\mu$ M HDACi: y axis represents PI response whereas x axis represents caspase-8-carboxyfluorescein (FAM) response. Quadrant 1 (bottom left) represents intact (live) cells (FAM<sup>-</sup>, PI<sup>-</sup>); Quadrant 2 (bottom right) represents caspases-8 responsive cells (FAM<sup>+</sup>, PI<sup>-</sup>).

**Table S2.** Time-dependent analysis of caspase-3/7 activation in Jurkat cells

| Treatment  | Caspase-3/7 Activity (Mean RLU) |         |         |         |
|------------|---------------------------------|---------|---------|---------|
|            | 6h                              | 12h     | 24h     | 48h     |
| Control    | 59,417                          | 69,935  | 136,627 | 109,510 |
| Vorinostat | 53,518                          | 157,988 | 125,484 | 95,463  |
| Compound 1 | 88,661                          | 97,513  | 76,948  | 105,357 |
| Compound 2 | 73,949                          | 110,650 | 80,438  | 71,048  |

**Table S3.** Standard deviation values for caspase-3/7 analysis in Jurkat cells

| Treatment  | 6h       | 12h      | 24h      | 48h      |
|------------|----------|----------|----------|----------|
| Control    | 10002.74 | 7003.63  | 31846.96 | 4710.453 |
| Vorinostat | 7939.778 | 8869.66  | 20509.97 | 10357.53 |
| Compound 1 | 11860.49 | 6312.14  | 5292.832 | 7390.019 |
| Compound 2 | 21813.73 | 10670.77 | 8117.586 | 6650.594 |
